# Supplementary material
Source: Springer Nature journal article supplement (https://www.springermedizin.de/resource/supplementary/12985_2008_509_MOESM9_ESM.pdf/9607908)
Supplement: MOESM9 [file 9607908]

| Gene                              | HXB2 coordinates | Sequence Logo and degeneracy                                                        | Function                                      |
|-----------------------------------|------------------|-------------------------------------------------------------------------------------|-----------------------------------------------|
| <i>gag</i><br>Figure 3a<br>'sl4'  | 793 - 807        |    | Fourth stem loop of encapsidation signal      |
| <i>pol</i><br>Figure 3b<br>'crs'  | 4092 - 4094      |    | Cis-repressive sequence start site            |
| Figure 3b<br>'ese'                | 4926 - 4937      |    | "TGGAAA" is an exonic splicing enhancer       |
| <i>vpr</i><br>Figure 3d<br>'ssa3' | 5759 - 5777      |    | 3' splice acceptor site A3                    |
| Figure 3d<br>'rnase'              | 5794 - 5805      |    | RNase-V1 cleavage site                        |
| <i>tat</i><br>Figure 4a<br>'ess2' | 5855 - 5863      |    | Exonic Splicing Silencer 2                    |
| <i>env</i><br>Figure 4c<br>'*'    | 7834 - 7842      |    | Rev binding loop in rev-responsive element    |
| Figure 4c<br>'ss'                 | 8349 - 8354      |  | Tat/rev 3' exons splice sites 7a, 7b          |
| Figure 4c<br>'ss'                 | 8376 - 8378      |  | Tat/rev 3' exons splice sites 7               |
| <i>nef</i><br>Figure 4d<br>'ppt'  | 9066 - 9076      |  | PPT (polypurine tract)                        |
| Figure 4d<br>'ppt'                | 9077 - 9086      |  | PPT, Priming of transcription                 |
| Figure 4d<br>'c'                  | 9084 - 9091      |  | PPT cleavage region                           |
| Figure 4d<br>'nre'                | 9183 - 9192      |  | 3'LTR negative responsive element start sites |
| Figure 4d<br>'ets'                | 9391 - 9399      |  | TF binding region for Ets-1 proteins          |
